# Supplementary material for: Sex-biased molecular differences in lung adenocarcinoma are ethnic and smoking specific
Source: PubMed Central journal article supplement (PMC10039609; doi:10.1186/s12890-023-02387-7), 2023-03-24
Supplement: 12890_2023_2387_MOESM1_ESM.pdf [file 12890_2023_2387_MOESM1_ESM.pdf]

## Supplemental Tables and Figures

**Table S1. Summary of data sets used in this study.**

| <b>Cohort</b>       | <b>Race</b> | <b>Somatic mutation</b> | <b>Method of DNA sequencing</b> | <b>mRNA expression</b> | <b>Method of RNA sequencing</b> |
|---------------------|-------------|-------------------------|---------------------------------|------------------------|---------------------------------|
| <b>OncoSG</b>       | Asian       | 299                     | WES                             | 167                    | RNA-seq                         |
| <b>Origimed2020</b> | Asian       | 1370                    | Targeted NGS                    | -                      | -                               |
| <b>CHOICE</b>       | Asian       | -                       | -                               | 128                    | RNA-seq                         |
| <b>TCGA</b>         | Non-Asian   | 356                     | WES                             | 356                    | RNA-seq                         |
| <b>MSK-IMPACT</b>   | Non-Asian   | 521                     | Targeted NGS                    | -                      | -                               |
| <b>GSE135222</b>    | Asian       | -                       | -                               | 27                     | RNA-seq                         |
| <b>GSE166449</b>    | Asian       | -                       | -                               | 22                     | RNA-seq                         |

**Table S2. The clinical characteristics of Asian LUAD patients for analyzing genetic variants in this study.**

| Characteristics       | OncoSG (Asian) |        |              |           |           |              | OrigiMed2020 (Asian) |        |              |           |           |              |
|-----------------------|----------------|--------|--------------|-----------|-----------|--------------|----------------------|--------|--------------|-----------|-----------|--------------|
|                       | Female         | Male   | <i>P</i>     | Female    | Male      | <i>P</i>     | Female               | Male   | <i>P</i>     | Female    | Male      | <i>P</i>     |
| <b>Sex</b>            |                |        |              |           |           |              |                      |        |              |           |           |              |
| <b>Smoking status</b> | smoker         | smoker |              | nonsmoker | nonsmoker |              | smoker               | smoker |              | nonsmoker | nonsmoker |              |
| <b>Total</b>          | 13             | 97     |              | 133       | 56        |              | 18                   | 390    |              | 676       | 286       |              |
| <b>Age</b>            |                |        |              |           |           |              |                      |        |              |           |           |              |
| <b>&lt;65</b>         | 6              | 45     | <i>1</i>     | 77        | 28        | <i>0.403</i> | 10                   | 242    | <i>0.759</i> | 493       | 204       | <i>0.668</i> |
| <b>≥65</b>            | 7              | 52     |              | 56        | 28        |              | 8                    | 148    |              | 183       | 82        |              |
| <b>Stage</b>          |                |        |              |           |           |              |                      |        |              |           |           |              |
| <b>I</b>              | 8              | 41     | <i>0.492</i> | 69        | 18        | <i>0.077</i> | 6                    | 127    | <i>0.360</i> | 319       | 122       | <i>0.054</i> |
| <b>II</b>             | 2              | 18     |              | 21        | 15        |              | 4                    | 39     |              | 72        | 20        |              |
| <b>III</b>            | 3              | 29     |              | 36        | 20        |              | 2                    | 82     |              | 95        | 55        |              |
| <b>IV</b>             | 0              | 9      |              | 7         | 3         |              | 6                    | 142    |              | 190       | 88        |              |

P: Chi-squared test

**Table S3. The clinical characteristics of Non-Asian LUAD patients for analyzing genetic variants in this study.**

| Characteristics       | TCGA (Non-Asian) |        |              |           |           |             | MSK-IMPACT (Non-Asian) |        |              |           |           |              |
|-----------------------|------------------|--------|--------------|-----------|-----------|-------------|------------------------|--------|--------------|-----------|-----------|--------------|
|                       | Female           | Male   | <i>P</i>     | Female    | Male      | <i>P</i>    | Female                 | Male   | <i>P</i>     | Female    | Male      | <i>P</i>     |
| <b>Sex</b>            |                  |        |              |           |           |             |                        |        |              |           |           |              |
| <b>Smoking status</b> | smoker           | smoker |              | nonsmoker | nonsmoker |             | smoker                 | smoker |              | nonsmoker | nonsmoker |              |
| <b>Total</b>          | 164              | 138    |              | 41        | 13        |             | 283                    | 145    |              | 62        | 31        |              |
| <b>Age</b>            |                  |        |              |           |           |             |                        |        |              |           |           |              |
| <b>&lt;65</b>         | 86               | 60     | <i>0.151</i> | 14        | 4         | <i>1</i>    | 97                     | 28     | <i>0.002</i> | 25        | 11        | <i>0.821</i> |
| <b>≥65</b>            | 78               | 78     |              | 27        | 9         |             | 186                    | 117    |              | 37        | 20        |              |
| <b>Stage</b>          |                  |        |              |           |           |             |                        |        |              |           |           |              |
| <b>I</b>              | 101              | 71     | <i>0.072</i> | 21        | 6         | <i>0.75</i> | -                      | -      | -            | -         | -         | -            |
| <b>II</b>             | 31               | 38     |              | 13        | 6         |             | -                      | -      |              | -         | -         |              |
| <b>III</b>            | 28               | 20     |              | 6         | 1         |             | -                      | -      |              | -         | -         |              |
| <b>IV</b>             | 4                | 9      |              | 1         | 0         |             | -                      | -      |              | -         | -         |              |

P: Chi-squared test

**Table S4. The driver mutations in the OncoSG cohort.**

| Gene           | N_nonsilent | N_silent | P value  | FDR      |
|----------------|-------------|----------|----------|----------|
| <i>EGFR</i>    | 155         | 6        | 0        | 0        |
| <i>SMAD4</i>   | 11          | 0        | 0        | 0        |
| <i>TP53</i>    | 112         | 1        | 0        | 0        |
| <i>RHPN2</i>   | 14          | 0        | 2.71E-09 | 1.02E-05 |
| <i>RB1</i>     | 10          | 1        | 2.27E-08 | 7.15E-05 |
| <i>PARP4</i>   | 16          | 1        | 4.36E-07 | 0.001    |
| <i>PTEN</i>    | 8           | 0        | 8.38E-07 | 0.002    |
| <i>OVCH1</i>   | 17          | 0        | 1.20E-06 | 0.003    |
| <i>RIMS2</i>   | 26          | 3        | 1.74E-06 | 0.003    |
| <i>SLC34A2</i> | 9           | 0        | 5.27E-06 | 0.009    |
| <i>CTNNA2</i>  | 12          | 2        | 8.79E-06 | 0.014    |
| <i>KEAP1</i>   | 13          | 1        | 1.55E-05 | 0.022    |
| <i>ZFHX4</i>   | 47          | 10       | 1.73E-05 | 0.023    |
| <i>COL11A1</i> | 24          | 3        | 2.00E-05 | 0.025    |
| <i>STK11</i>   | 11          | 2        | 2.24E-05 | 0.026    |
| <i>ZNF804A</i> | 14          | 2        | 3.07E-05 | 0.034    |

**Table S5. Comparison of driver mutations between female and male smokers with LUAD in the OncoSG cohort.**

| Gene           | Female  | Male     | P value  | FDR | Driver mutation | Sex-biased |
|----------------|---------|----------|----------|-----|-----------------|------------|
| <i>TP53</i>    | 7 (54%) | 46 (48%) | 0.773772 | 1   | Yes             | Unbiased   |
| <i>EGFR</i>    | 7 (54%) | 20 (21%) | 0.017173 | 1   | Yes             | Unbiased   |
| <i>ZFHX4</i>   | 1 (8%)  | 26 (27%) | 0.178113 | 1   | Yes             | Unbiased   |
| <i>COL11A1</i> | 1 (8%)  | 16 (17%) | 0.687454 | 1   | Yes             | Unbiased   |
| <i>RIMS2</i>   | 1 (8%)  | 14 (15%) | 0.68916  | 1   | Yes             | Unbiased   |
| <i>OVCH1</i>   | 0 (0%)  | 13 (14%) | 0.359192 | 1   | Yes             | Unbiased   |
| <i>KEAP1</i>   | 0 (0%)  | 11 (11%) | 0.353556 | 1   | Yes             | Unbiased   |
| <i>STK11</i>   | 1 (8%)  | 9 (9%)   | 1        | 1   | Yes             | Unbiased   |
| <i>PARP4</i>   | 1 (8%)  | 9 (9%)   | 1        | 1   | Yes             | Unbiased   |
| <i>ZNF804A</i> | 0 (0%)  | 9 (9%)   | 0.596011 | 1   | Yes             | Unbiased   |
| <i>CTNNA2</i>  | 1 (8%)  | 5 (5%)   | 0.545815 | 1   | Yes             | Unbiased   |
| <i>RB1</i>     | 0 (0%)  | 5 (5%)   | 1        | 1   | Yes             | Unbiased   |
| <i>SLC34A2</i> | 1 (8%)  | 4 (4%)   | 0.476804 | 1   | Yes             | Unbiased   |
| <i>PTEN</i>    | 0 (0%)  | 3 (3%)   | 1        | 1   | Yes             | Unbiased   |
| <i>RHPN2</i>   | 1 (8%)  | 3 (3%)   | 0.402874 | 1   | Yes             | Unbiased   |
| <i>SMAD4</i>   | 1 (8%)  | 2 (2%)   | 0.319405 | 1   | Yes             | Unbiased   |

**Table S6. Comparison of driver and passenger mutations between female and male nonsmokers with LUAD in the OncoSG cohort.**

| <b>Gene</b>     | <b>Female</b> | <b>Male</b> | <b>P value</b> | <b>FDR</b> | <b>Driver mutation</b> | <b>Sex-biased</b> |
|-----------------|---------------|-------------|----------------|------------|------------------------|-------------------|
| <i>EGFR</i>     | 81 (63%)      | 29 (52%)    | 0.190929       | 0.375275   | Yes                    | Unbiased          |
| <i>TP53</i>     | 33 (26%)      | 21 (38%)    | 0.116551       | 0.331138   | Yes                    | Unbiased          |
| <i>RHPN2</i>    | 7 (5%)        | 2 (4%)      | 0.724707       | 0.841144   | Yes                    | Unbiased          |
| <i>ZFHX4</i>    | 7 (5%)        | 4 (7%)      | 0.737846       | 0.841144   | Yes                    | Unbiased          |
| <i>PARP4</i>    | 6 (5%)        | 0 (0%)      | 0.179911       | 0.366246   | Yes                    | Unbiased          |
| <i>SMAD4</i>    | 5 (4%)        | 1 (2%)      | 0.669028       | 0.841144   | Yes                    | Unbiased          |
| <i>PTEN</i>     | 4 (3%)        | 1 (2%)      | 1              | 1          | Yes                    | Unbiased          |
| <i>RIMS2</i>    | 4 (3%)        | 2 (4%)      | 1              | 1          | Yes                    | Unbiased          |
| <i>RB1</i>      | 3 (2%)        | 2 (4%)      | 0.636606       | 1          | Yes                    | Unbiased          |
| <i>SLC34A2</i>  | 2 (2%)        | 2 (4%)      | 0.584369       | 1          | Yes                    | Unbiased          |
| <i>CTNNA2</i>   | 2 (2%)        | 4 (7%)      | 0.066832       | 0.8212     | Yes                    | Unbiased          |
| <i>COL11A1</i>  | 2 (2%)        | 2 (4%)      | 0.584369       | 1          | Yes                    | Unbiased          |
| <i>ZNF804A</i>  | 2 (2%)        | 2 (4%)      | 0.584369       | 1          | Yes                    | Unbiased          |
| <i>KEAPI</i>    | 0 (0%)        | 2 (4%)      | 0.088552       | 0.8212     | Yes                    | Unbiased          |
| <i>OVCH1</i>    | 0 (0%)        | 2 (4%)      | 0.088552       | 0.8212     | Yes                    | Unbiased          |
| <i>STK11</i>    | 0 (0%)        | 1 (2%)      | 0.299465       | 0.8212     | Yes                    | Unbiased          |
| <i>MACF1</i>    | 3 (2%)        | 7 (12%)     | 0.009597       | 0.066904   | No                     | Male-biased       |
| <i>FAT4</i>     | 1 (1%)        | 6 (11%)     | 0.003476       | 0.06605    | No                     | Male-biased       |
| <i>ADAMTS12</i> | 0 (0%)        | 6 (11%)     | 0.000654       | 0.037284   | No                     | Male-biased       |
| <i>CSMD2</i>    | 2 (2%)        | 6 (11%)     | 0.010564       | 0.066904   | No                     | Male-biased       |
| <i>PCDH15</i>   | 2 (2%)        | 6 (11%)     | 0.010564       | 0.066904   | No                     | Male-biased       |
| <i>PKHD1</i>    | 2 (2%)        | 6 (11%)     | 0.010564       | 0.066904   | No                     | Male-biased       |
| <i>SUSD2</i>    | 0 (0%)        | 5 (9%)      | 0.002296       | 0.06543    | No                     | Male-biased       |
| <i>C1orf173</i> | 1 (1%)        | 5 (9%)      | 0.010504       | 0.066904   | No                     | Male-biased       |
| <i>NSD1</i>     | 1 (1%)        | 5 (9%)      | 0.010504       | 0.066904   | No                     | Male-biased       |

**Table S7. Comparison of driver mutations between female and male smokers with LUAD in the OrigiMed2020 cohort.**

| Gene           | Female    | Male      | P value  | FDR      | Driver mutation | Sex-biased    |
|----------------|-----------|-----------|----------|----------|-----------------|---------------|
| <i>EGFR</i>    | 482 (71%) | 154 (54%) | 1.73E-07 | 7.54E-05 | Yes             | Female-biased |
| <i>KRAS</i>    | 36 (5%)   | 45 (16%)  | 3.51E-07 | 7.65E-05 | Yes             | Male-biased   |
| <i>KEAP1</i>   | 6 (1%)    | 18 (6%)   | 4.60E-06 | 6.68E-04 | Yes             | Male-biased   |
| <i>STK11</i>   | 7 (1%)    | 18 (6%)   | 1.20E-05 | 1.31E-03 | Yes             | Male-biased   |
| <i>SMARCA4</i> | 16 (2%)   | 25 (9%)   | 2.17E-05 | 1.89E-03 | Yes             | Male-biased   |
| <i>KAT6A</i>   | 4 (1%)    | 13 (5%)   | 8.02E-05 | 5.83E-03 | Yes             | Male-biased   |
| <i>ATM</i>     | 8 (1%)    | 16 (6%)   | 1.67E-04 | 0.0104   | Yes             | Male-biased   |
| <i>FAT3</i>    | 34 (5%)   | 33 (12%)  | 3.87E-04 | 0.0211   | Yes             | Male-biased   |
| <i>TP53</i>    | 258 (38%) | 142 (50%) | 6.38E-04 | 0.029    | Yes             | Male-biased   |
| <i>LRP1B</i>   | 53 (8%)   | 41 (14%)  | 1.84E-03 | 0.0729   | Yes             | Male-biased   |
| <i>SPTAI1</i>  | 34 (5%)   | 30 (10%)  | 2.05E-03 | 0.0743   | Yes             | Male-biased   |

**Table S8. The driver mutations in the TCGA cohort.**

| Gene           | N_nonsilent | N_silent | P value  | FDR      |
|----------------|-------------|----------|----------|----------|
| <i>KRAS</i>    | 124         | 0        | 0        | 0        |
| <i>STK11</i>   | 68          | 1        | 0        | 0        |
| <i>TP53</i>    | 189         | 1        | 4.44E-16 | 2.79E-12 |
| <i>KEAP1</i>   | 63          | 1        | 8.88E-16 | 4.19E-12 |
| <i>EGFR</i>    | 67          | 1        | 2.89E-15 | 1.09E-11 |
| <i>RBI</i>     | 22          | 0        | 5.88E-13 | 1.85E-09 |
| <i>RBM10</i>   | 23          | 1        | 1.91E-12 | 5.14E-09 |
| <i>SMARCA4</i> | 31          | 3        | 9.91E-10 | 2.34E-06 |
| <i>SMAD4</i>   | 16          | 0        | 4.90E-06 | 0.010    |
| <i>CDKN2A</i>  | 17          | 1        | 9.03E-06 | 0.017    |
| <i>ARID1A</i>  | 24          | 2        | 2.65E-05 | 0.042    |

**Table S9. Comparison of driver and passenger mutations between female and male smokers with LUAD in the TCGA cohort.**

| Gene           | Female   | Male     | P value  | FDR      | Driver mutation | Sex-biased    |
|----------------|----------|----------|----------|----------|-----------------|---------------|
| <i>TP53</i>    | 91 (55%) | 67 (49%) | 0.248613 | 0.985129 | Yes             | Unbiased      |
| <i>KRAS</i>    | 70 (43%) | 46 (33%) | 0.098508 | 0.940898 | Yes             | Unbiased      |
| <i>STK11</i>   | 28 (17%) | 33 (24%) | 0.152132 | 0.940898 | Yes             | Unbiased      |
| <i>KEAP1</i>   | 31 (19%) | 29 (21%) | 0.666351 | 1        | Yes             | Unbiased      |
| <i>EGFR</i>    | 25 (15%) | 7 (5%)   | 0.004544 | 0.491729 | Yes             | Unbiased      |
| <i>RBM10</i>   | 7 (4%)   | 15 (11%) | 0.04337  | 0.940898 | Yes             | Unbiased      |
| <i>SMARCA4</i> | 14 (9%)  | 15 (11%) | 0.558542 | 1        | Yes             | Unbiased      |
| <i>ARID1A</i>  | 14 (9%)  | 7 (5%)   | 0.264653 | 0.985129 | Yes             | Unbiased      |
| <i>RBI</i>     | 13 (8%)  | 6 (4%)   | 0.239669 | 0.985129 | Yes             | Unbiased      |
| <i>SMAD4</i>   | 4 (2%)   | 6 (4%)   | 0.520934 | 0.999522 | Yes             | Unbiased      |
| <i>CDKN2A</i>  | 6 (4%)   | 7 (5%)   | 0.580685 | 1        | Yes             | Unbiased      |
| <i>AMER1</i>   | 19 (12%) | 1 (1%)   | 8.38E-05 | 0.081305 | No              | Female-biased |
| <i>ZMYM3</i>   | 15 (9%)  | 0 (0%)   | 8.26E-05 | 0.081305 | No              | Female-biased |

**Table S10. Comparison of driver mutations between female and male nonsmokers with LUAD in the TCGA cohort.**

| Gene           | Female   | Male    | P value  | FDR      | Driver mutation | Sex-biased |
|----------------|----------|---------|----------|----------|-----------------|------------|
| <i>EGFR</i>    | 21 (51%) | 3 (23%) | 0.111037 | 0.589593 | Yes             | Unbiased   |
| <i>TP53</i>    | 15 (37%) | 5 (38%) | 1        | 1        | Yes             | Unbiased   |
| <i>KRAS</i>    | 3 (7%)   | 3 (23%) | 0.142855 | 0.589593 | Yes             | Unbiased   |
| <i>STK11</i>   | 1 (2%)   | 3 (23%) | 0.039339 | 0.589593 | Yes             | Unbiased   |
| <i>SMAD4</i>   | 3 (7%)   | 2 (15%) | 0.583714 | 1        | Yes             | Unbiased   |
| <i>KEAP1</i>   | 1 (2%)   | 2 (15%) | 0.140461 | 0.589593 | Yes             | Unbiased   |
| <i>RBM10</i>   | 0 (0%)   | 1 (8%)  | 0.240741 | 0.589593 | Yes             | Unbiased   |
| <i>SMARCA4</i> | 0 (0%)   | 1 (8%)  | 0.240741 | 0.589593 | Yes             | Unbiased   |
| <i>CDKN2A</i>  | 1 (2%)   | 1 (8%)  | 0.426974 | 0.829468 | Yes             | Unbiased   |
| <i>RBI</i>     | 2 (5%)   | 0 (0%)  | 1        | 1        | Yes             | Unbiased   |
| <i>ARID1A</i>  | 1 (2%)   | 0 (0%)  | 1        | 1        | Yes             | Unbiased   |

**Table S11. Comparison of driver mutations between female and male smokers with LUAD in the MSKCC-IMPACT cohort.**

| Gene         | Female   | Male     | P value  | FDR      | Driver mutation | Sex-biased  |
|--------------|----------|----------|----------|----------|-----------------|-------------|
| <i>STK11</i> | 42 (15%) | 42 (29%) | 0.000739 | 0.077032 | Yes             | Male-biased |
| <i>KEAP1</i> | 31 (11%) | 34 (23%) | 0.000951 | 0.077032 | Yes             | Male-biased |

**Table S12. Comparison of driver mutations between female and male nonsmokers with LUAD in the MSKCC-IMPACT cohort.**

| Gene        | Female   | Male     | P value  | FDR      | Driver mutation | Sex-biased    |
|-------------|----------|----------|----------|----------|-----------------|---------------|
| <i>EGFR</i> | 41 (66%) | 12 (39%) | 0.024363 | 0.087988 | Yes             | Female-biased |
| <i>MET</i>  | 2 (3%)   | 5 (16%)  | 0.035195 | 0.087988 | Yes             | Male-biased   |

## Asian from CHOICE

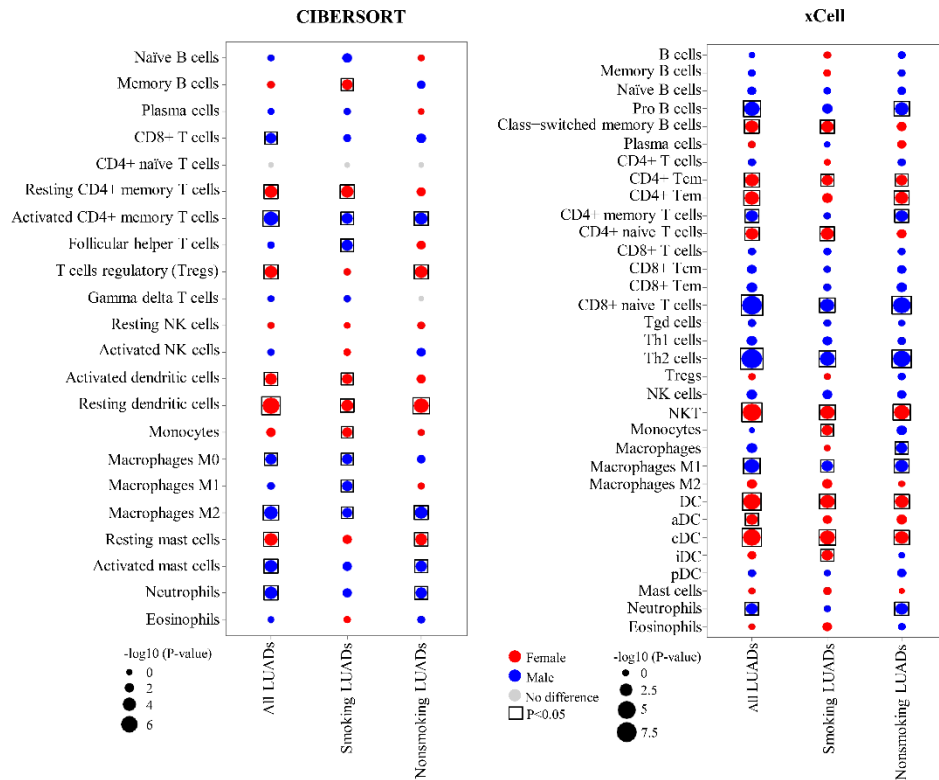

**Figure S1. The distributions of immune cell subtypes between male and female LUADs.** The bubble plots display the distribution of immune cells between female and male LUADs in the CHOICE cohort. The black boxes represent a statistical significance from Mann-Whitney U test ( $P < 0.05$ ).
